# Supplementary material for: Prevalence and genetic diversity of Echinorhynchus gymnocyprii (Acanthocephala: Echinorhynchidae) in schizothoracine fishes (Cyprinidae: Schizothoracinae) in Qinghai-Tibetan Plateau, China
Source: PubMed Central journal article supplement (PMC7372853; doi:10.1186/s13071-020-04224-w), 2020-07-20

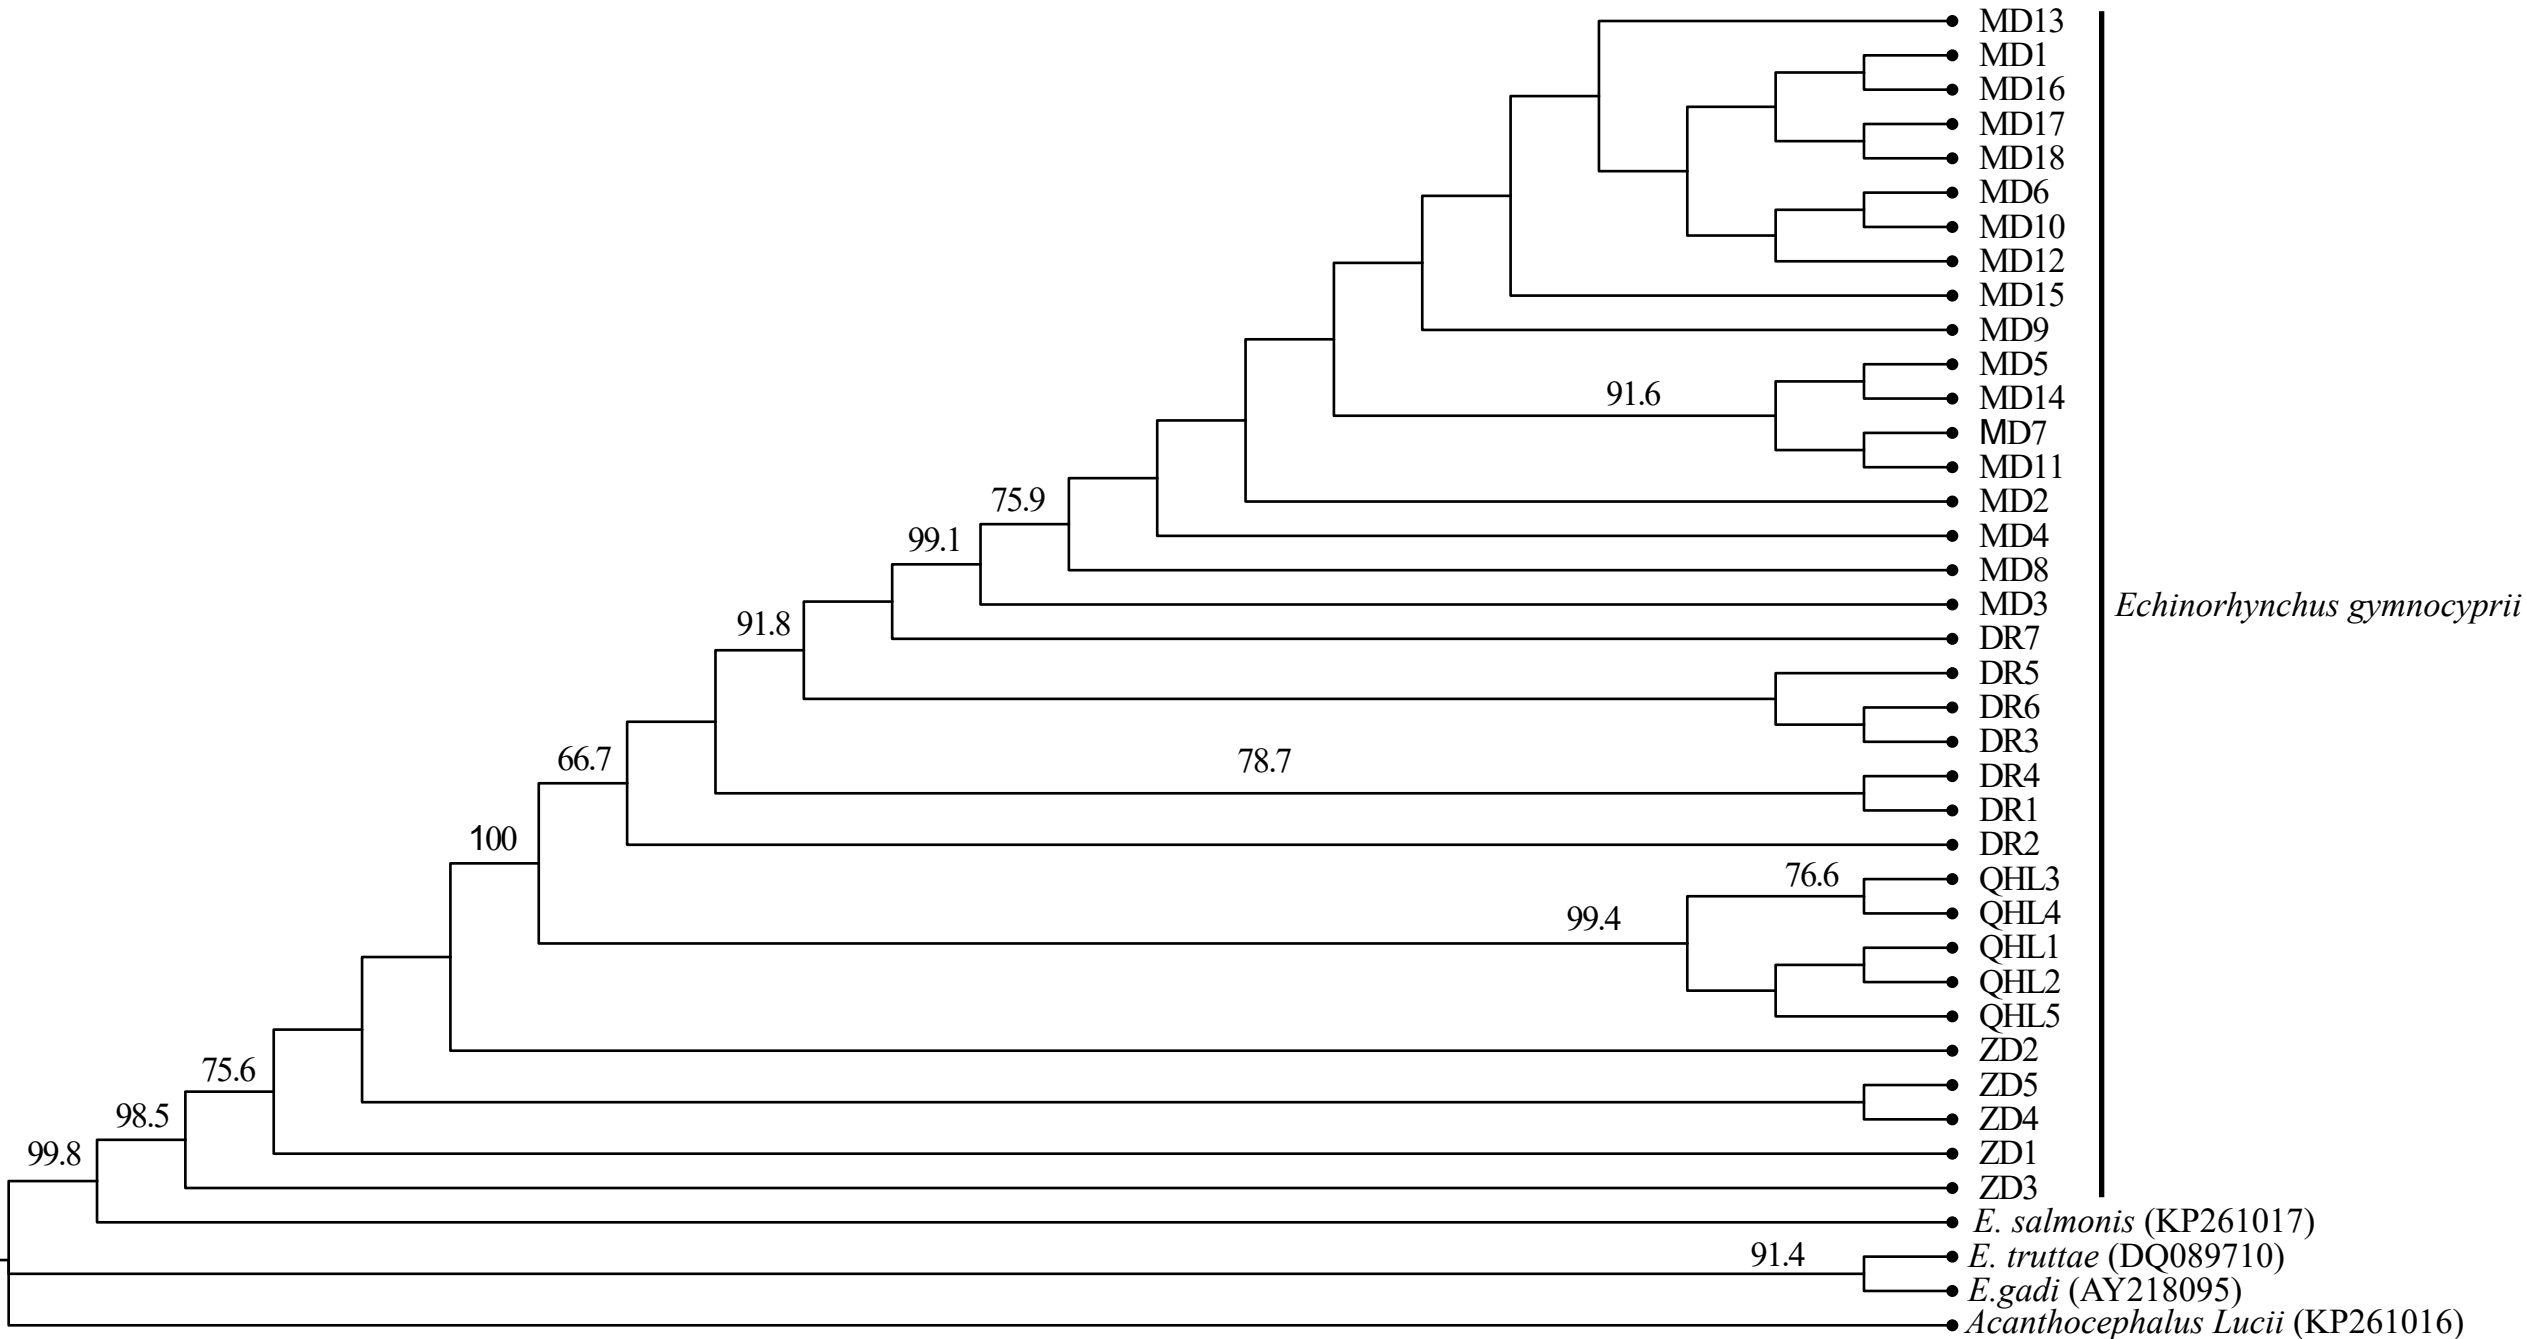

Supplement: 13071_2020_4224_MOESM4_ESM.pdf [file 13071_2020_4224_MOESM4_ESM.pdf]
